# Supplementary material for: Identification of a lncRNA based ceRNA network signature to establish a prognostic model and explore potential therapeutic targets in gastric cancer
Source: Research Square preprint supplement (doi:10.21203/rs.3.rs-4989662/v1), 2025-04-03
Supplement: Supplementary file 1 [file 2a17d80fb67840aae37e9125.docx]

**Supplementary Table 1.** Clinical data of GC patients.

| **Clinicopathologic features** | **number of cases** |
| --- | --- |
|
| **Gender** |  |
| Male | 13 |
| Female | 10 |
| **Age** |  |
| ＜60 | 7 |
| ≥60 | 16 |
| **Degree of differentiation** |  |
| I/II | 8 |
| Ⅲ | 15 |
| **pT** |  |
| T1-2 | 6 |
| T3-4 | 17 |
| **pN** |  |
| N0 | 14 |
| N1-2 | 9 |

**Supplementary Table 2.** The primers of specific genes.

| **Gene** | **Forward** | **Reverse** |
| --- | --- | --- |
| AP000695.2 | GGACACTCTGAAGGAACTC | GATGACCATTAGCCAACAAG |
| AC010333.1 | TATTCGCAAGCCCTCAACCA | GAGGAGTTAGGGCATGGCAG |
| LINC01579 | ACCGATGCTTTGCTACGCTA | CGCAAAACATTCAGACCCCC |
| LINC00922 | ACAGTGCCGTGAGACTTAGC | CAGGAGGCTCCAAAGACAGG |
| AL121772.1 | TAGGCCTAACCACCGCTACT | GGGTGGGCCCGTTTAACATA |
| VCAN | CCACGCTTCCTATGTGA | TTTCCCACTTTGACTTTATGT |
| CDH11 | ATGAAGGAGAACTACTGTTTAC | TTAAGAATCGTCATCAAAAGTG |
| COL12A1 | CCACAGGTTCAAGAGGTCCC | TGTGTTAGCCGGAACCTGGA |
| COL5A2 | AACATCAGTTGGGTGGAG | CTTGAAATCGGTGTAGGC |
| GADPH | CTCCTCCTGTTCGACAGTCAGC | CCCAATACGACCAAATCCGTT |

**Supplementary Table 3.** The expression of potential mRNAs showed a positively correlation with AP000695.2 in the ceRNA network.

| lncRNA | mRNA | correlation | *P* value |
| --- | --- | --- | --- |
| AP000695.2 | CDH11 | 0.328854 | 1.02E-11 |
| AP000695.2 | COL12A1 | 0.353017 | 2.18E-13 |
| AP000695.2 | STC2 | 0.189257 | 0.000122 |
| AP000695.2 | THBS2 | 0.367642 | 1.80E-14 |
| AP000695.2 | COL1A2 | 0.419039 | 9.76E-19 |
| AP000695.2 | COL5A1 | 0.381976 | 1.38E-15 |
| AP000695.2 | COL5A2 | 0.440786 | 8.92E-21 |
| AP000695.2 | LOXL2 | 0.418427 | 1.11E-18 |
| AP000695.2 | PRRX1 | 0.324467 | 1.97E-11 |
| AP000695.2 | TIMP3 | 0.110768 | 0.02544 |
| AP000695.2 | COL11A1 | 0.399066 | 5.45E-17 |
| AP000695.2 | TNFSF11 | 0.148633 | 0.002647 |
| AP000695.2 | VCAN | 0.408634 | 8.20E-18 |

**Supplementary Table 4.** Clinical characteristics of 67 gastric cancer patients and IHC score of VCAN in tumor.

| Case | Age  (years) | Gender | Stage | IHC score | PFS  (Months) |
| --- | --- | --- | --- | --- | --- |
| 1 | 60 | male | Ⅰ | 0 | 21.2 |
| 2 | 64 | female | Ⅰ | 2 | 16.5 |
| 3 | 59 | female | Ⅰ-Ⅱ | 0 | 12.3 |
| 4 | 59 | male | Ⅰ-Ⅱ | 0 | 11.2 |
| 5 | 76 | male | Ⅰ-Ⅱ | 7 | 9.2 |
| 6 | 49 | female | Ⅱ | 7 | 7.8 |
| 7 | 58 | male | Ⅱ | 3 | 10.1 |
| 8 | 64 | male | Ⅱ | 2 | 5.9 |
| 9 | 67 | male | Ⅱ | 2 | 10.5 |
| 10 | 70 | male | Ⅱ | 2 | 6.5 |
| 11 | 70 | male | Ⅱ | 0 | 10.8 |
| 12 | 71 | male | Ⅱ | 6 | 3.5 |
| 13 | 72 | female | Ⅱ | 1 | 2.5 |
| 14 | 75 | male | Ⅱ | 3 | 6.2 |
| 15 | 76 | female | Ⅱ | 2 | 9.8 |
| 16 | 46 | male | Ⅱ-Ⅲ | 3 | 9.3 |
| 17 | 51 | female | Ⅱ-Ⅲ | 5 | 3.5 |
| 18 | 58 | male | Ⅱ-Ⅲ | 2 | 16.9 |
| 19 | 66 | female | Ⅱ-Ⅲ | 9 | 13.1 |
| 20 | 67 | female | Ⅱ-Ⅲ | 2 | 15.1 |
| 21 | 67 | male | Ⅱ-Ⅲ | 6 | 5.5 |
| 22 | 68 | female | Ⅱ-Ⅲ | 2 | 6.7 |
| 23 | 68 | male | Ⅱ-Ⅲ | 6 | 6.2 |
| 24 | 71 | female | Ⅱ-Ⅲ | 7 | 7.8 |
| 25 | 72 | male | Ⅱ-Ⅲ | 2 | 3 |
| 26 | 74 | male | Ⅱ-Ⅲ | 0 | 8.7 |
| 27 | 82 | male | Ⅱ-Ⅲ | 7 | 4.5 |
| 28 | 40 | female | Ⅲ | 1 | 3.5 |
| 29 | 47 | female | Ⅲ | 0 | 7.7 |
| 30 | 47 | male | Ⅲ | 3 | 6.9 |
| 31 | 47 | male | Ⅲ | 7 | 3.9 |
| 32 | 56 | female | Ⅲ | 6 | 6.9 |
| 33 | 57 | female | Ⅲ | 5 | 9.1 |
| 34 | 57 | female | Ⅲ | 4 | 8.7 |
| 35 | 58 | male | Ⅲ | 8 | 5.2 |
| 36 | 60 | female | Ⅲ | 9 | 7.1 |
| 37 | 60 | male | Ⅲ | 3 | 5.6 |
| 38 | 61 | female | Ⅲ | 2 | 7.3 |
| 39 | 61 | female | Ⅲ | 8 | 7.3 |
| 40 | 61 | male | Ⅲ | 1 | 2.2 |
| 41 | 61 | male | Ⅲ | 6 | 5.7 |
| 42 | 63 | male | Ⅲ | 0 | 4.2 |
| 43 | 63 | male | Ⅲ | 1 | 1.8 |
| 44 | 64 | female | Ⅲ | 6 | 5.1 |
| 45 | 65 | female | Ⅲ | 1 | 6.3 |
| 46 | 65 | male | Ⅲ | 6 | 2.3 |
| 47 | 66 | male | Ⅲ | 6 | 5 |
| 48 | 66 | male | Ⅲ | 4 | 12.9 |
| 49 | 67 | female | Ⅲ | 2 | 7 |
| 50 | 67 | female | Ⅲ | 9 | 7.9 |
| 51 | 68 | male | Ⅲ | 0 | 4.7 |
| 52 | 68 | male | Ⅲ | 0 | 11.5 |
| 53 | 69 | male | Ⅲ | 2 | 6.9 |
| 54 | 69 | male | Ⅲ | 3 | 5.9 |
| 55 | 69 | male | Ⅲ | 5 | 7.8 |
| 56 | 70 | male | Ⅲ | 3 | 8 |
| 57 | 70 | male | Ⅲ | 5 | 2.3 |
| 58 | 70 | male | Ⅲ | 6 | 6.5 |
| 59 | 72 | male | Ⅲ | 6 | 6.6 |
| 60 | 73 | male | Ⅲ | 1 | 9.5 |
| 61 | 74 | male | Ⅲ | 0 | 2.7 |
| 62 | 74 | male | Ⅲ | 9 | 12.3 |
| 63 | 75 | male | Ⅲ | 6 | 3.6 |
| 64 | 76 | male | Ⅲ | 1 | 5.6 |
| 65 | 76 | male | Ⅲ | 6 | 7.6 |
| 66 | 77 | male | Ⅲ | 0 | 6.8 |
| 67 | 77 | male | Ⅲ | 7 | 8.2 |

The immunoreactivity of VCAN in STAD was scored in terms of the percentage of positive cells and staining intensity by two independent observers. The percentage of positive cells was scored as follows: 0 = no positive cells; 1 = 0–10% positive cells; 2 = 11–50% positive cells; and 3 => 51% positive cells. Staining intensity was scored as follows: 0 = no staining (negative); 1 = mild reaction; 2 = moderate reaction; and 3 = strong reaction. The product of the percentage of positive and staining intensity is the final score of the sections. A score of < 4 is defined as low level, whereas a score of ≧ 4 is defined as high level.


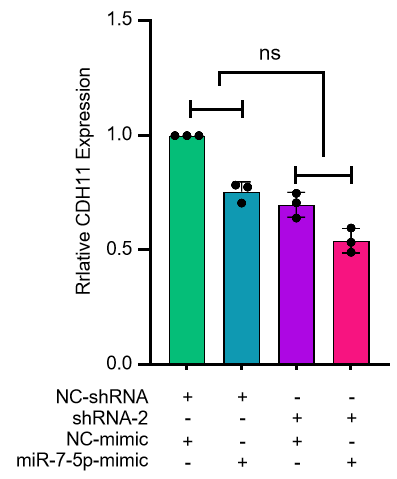


**Supplemental Figure 1.** In AP000695.2 knockdown cells, miR-7-5p-minic showed no significant change in its ability to downregulate CDH11 expression
